# Supplementary material
Source: Springer Nature journal article supplement (https://www.springermedizin.de/resource/supplementary/12891_2011_1268_MOESM3_ESM.pdf/9507494)

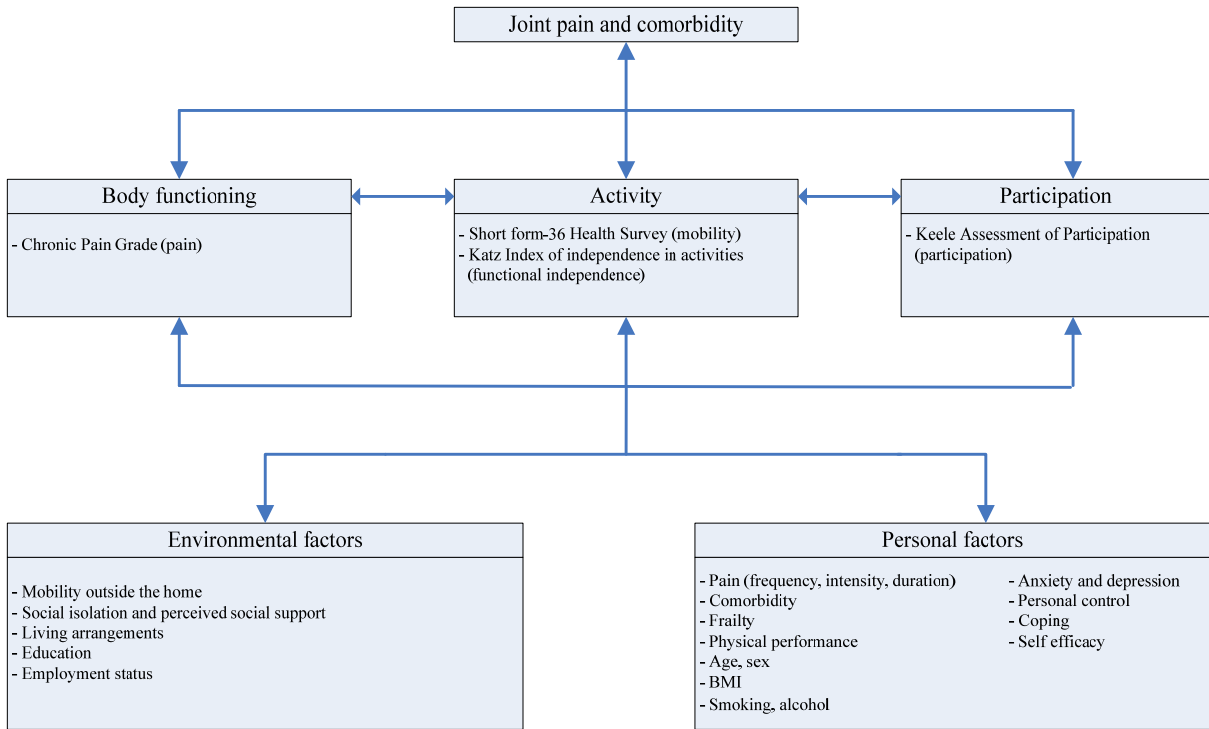

Supplement: MOESM3 [file 9507494]
